# Supplementary material for: Streamlined Multimodal DESI and MALDI Mass Spectrometry Imaging on a Singular Dual-Source FT-ICR Mass Spectrometer
Source: MDPI journal article supplement (doi:10.3390/metabo11040253), 2021-04-20
Supplement: s1 [file s1]

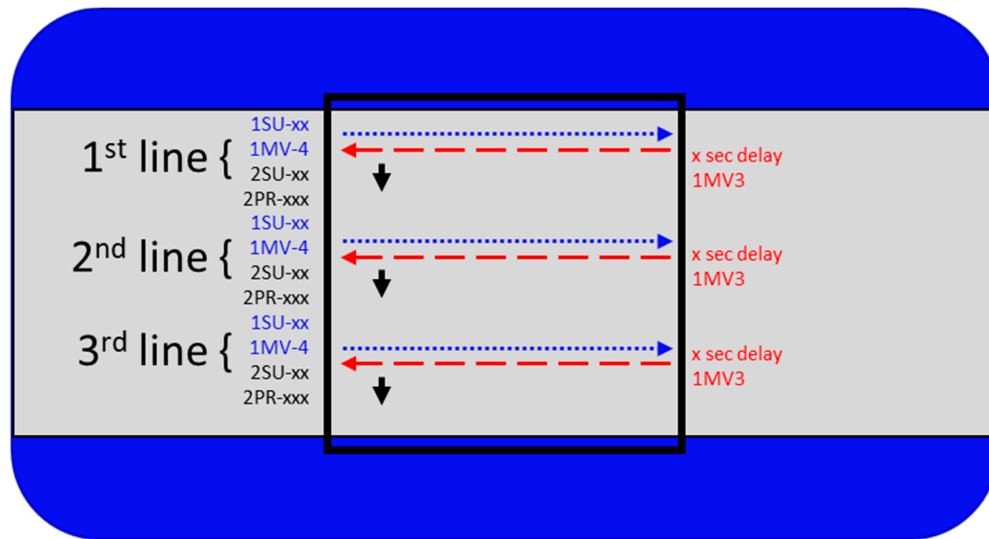

Supplementary Figure S1: Fly back pattern and subsequent ASCII commands utilized in the command file utilized for the XY array of Agilis LS-25-27 positioners. The blue rectangle with rounded corners is the 3D printed slide holder, gray rectangle is the slide (drawn to relative scale for 25mm by 75mm), with the black box representing the relative scale of the 27mm by 27mm travel range of the linear array. The ASCII commands functions are color coded blue, black, and red for the relative stage movement shown by the arrows and are as follows where 1 and 2 are the X or Y stages, and xx corresponds to an integer: 1SU-xx, set the negative step size of axis 1 to xx; 1MV-4, move to the negative limit (left limit switch) at the set step size; 1MV3, move to the positive limit switch at maximum step size and velocity after a set number of delays; 2SU-xx, set the negative step size of axis 2 to xx; 2PR-xxx, move axis two -xxx steps to the negative limit. Number of steps and step sizes for determination of average linear velocity must be calibrated prior to each run.

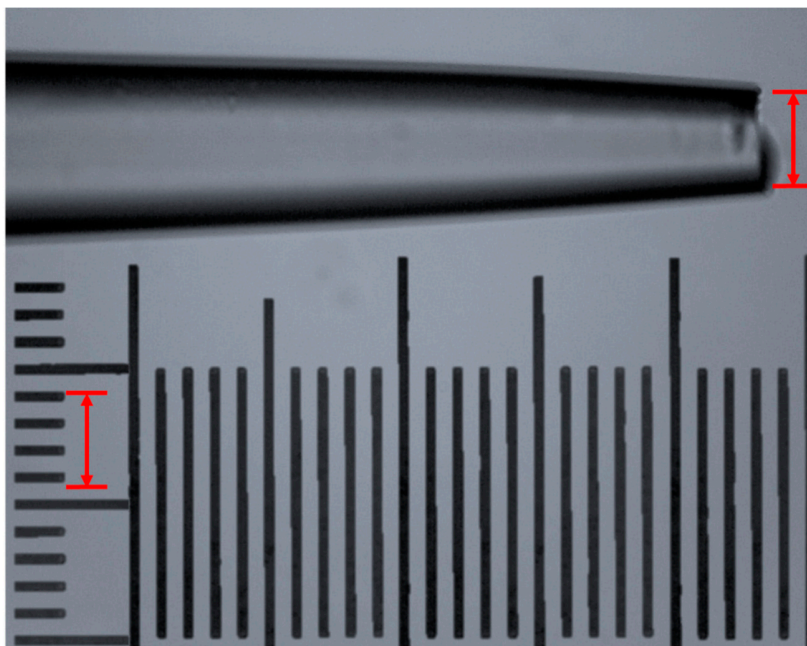

Supplementary Figure S2: Measurement of the pulled spray capillary by bright-field microscopy, each graduation in the scale bar is  $10\mu\text{m}$ . The final outer diameter (OD) of the tip was estimated at  $35\mu\text{m}$  after measurement of pixels, the jet of solvent produced allowed estimation of the inner diameter (ID) at  $30\mu\text{m}$ . Images were captured using an AmScope 1.3MP USB camera and AmScope 3.7 software.

Supplementary Table S1: Annotations of species from the averaged MALDI and DESI-MSI, non-recalibrated from LIPIDMAPS, peaks with greater than 0.075% intensity were taken from the charge deconvolution in DataAnalysis 5.0 and searched with parameters of  $\pm 0.1$  Da as peaks were not internally recalibrated. The ionization source is indicated, observed mass, matched mass, delta change, annotation, name, and ionic formula are noted.

| Ionization Source | Input Mass | Matched Mass | Delta (mDa) | Name       | Formula         |
|-------------------|------------|--------------|-------------|------------|-----------------|
| DESI              | 1520.2392  | 1520.1517    | 87.5        | CL 76:1    | C85H164O17P2    |
| DESI              | 1542.2194  | 1542.1360    | 83.4        | CL 78:4    | C87H162O17P2    |
| DESI              | 1542.2194  | 1542.1336    | 85.8        | CL 76:1    | C85H164O17P2Na  |
| DESI              | 1558.1943  | 1558.1075    | 86.8        | CL 76:1    | C85H164O17P2K   |
| DESI              | 1532.1727  | 1532.1880    | -15.3       | CL 78:0    | C87H170O17P2    |
| DESI              | 1532.1727  | 1532.0919    | 80.8        | CL 74:0    | C83H162O17P2K   |
| DESI              | 1590.1575  | 1590.1312    | 26.3        | CL 78:2    | C87H166O17P2Na2 |
| DESI              | 1494.2182  | 1494.1360    | 82.2        | CL 74:0    | C83H162O17P2    |
| DESI              | 1516.1962  | 1516.1204    | 75.8        | CL 76:3    | C85H160O17P2    |
| DESI              | 1516.1962  | 1516.1179    | 78.3        | CL 74:0    | C83H162O17P2Na  |
| DESI              | 1592.2323  | 1592.1492    | 83.1        | CL 80:3    | C89H166O17P2Na  |
| DESI              | 1592.2323  | 1592.1492    | 83.1        | CL 80:4    | C89H166O17P2Na  |
| DESI              | 1592.2323  | 1592.1468    | 85.5        | CL 78:1    | C87H168O17P2Na2 |
| DESI              | 1548.2695  | 1548.1830    | 86.5        | CL 78:1    | C87H168O17P2    |
| DESI              | 1522.1372  | 1522.1673    | -30.1       | CL 76:0    | C85H166O17P2    |
| DESI              | 1522.1372  | 1522.1098    | 27.4        | CL 78:5    | C87H160O17P2    |
| DESI              | 1589.6546  | 1589.5843    | 70.3        | LPIM6 16:0 | C61H109O42PNa2  |
| DESI              | 1603.6668  | 1603.5999    | 66.9        | LPIM6 17:0 | C62H111O42PNa2  |
| DESI              | 1529.6379  | 1529.7239    | -86.0       | PIM4 34:1  | C67H121O33PNa2  |
| DESI              | 1501.6075  | 1501.6950    | -87.5       | PIM4 34:4  | C67H115O33PNa   |
| DESI              | 1501.6075  | 1501.6926    | -85.1       | PIM4 32:1  | C65H117O33PNa2  |
| DESI              | 1500.1494  | 1500.1254    | 24.0        | CL 76:2    | C85H162O17P2    |
| DESI              | 1551.6561  | 1551.6098    | 46.3        | LPIM6 18:2 | C63H109O42P     |
| DESI              | 1551.6561  | 1551.7472    | -91.1       | PIM4 36:1  | C69H125O33PK    |
| DESI              | 1521.6566  | 1521.7003    | -43.7       | PIM4 34:2  | C67H119O33PK    |
| MALDI             | 1494.1670  | 1494.1360    | 31.0        | CL 74:0    | C83H162O17P2    |
| MALDI             | 1494.1670  | 1494.0785    | 88.5        | CL 76:5    | C85H156O17P2    |
| MALDI             | 1520.1840  | 1520.1517    | 32.3        | CL 76:1    | C85H164O17P2    |
| MALDI             | 1520.1840  | 1520.0941    | 89.9        | CL 78:6    | C87H158O17P2    |
| MALDI             | 1532.1250  | 1532.0578    | 67.2        | CL 78:9    | C87H152O17P2    |
| MALDI             | 1532.1250  | 1532.1880    | 63.0        | CL 78:0    | C87H170O17P2    |
| MALDI             | 1532.1250  | 1532.0553    | 69.6        | CL 76:6    | C85H154O17P2Na  |
| MALDI             | 1532.1250  | 1532.0919    | 33.1        | CL 74:0    | C83H162O17P2K   |
| MALDI             | 1532.1250  | 1532.0529    | 72.1        | CL 74:3    | C83H156O17P2Na2 |
| MALDI             | 1558.1408  | 1558.1075    | 33.3        | CL 76:1    | C85H164O17P2K   |

|       |           |           |        |                                                 |                 |
|-------|-----------|-----------|--------|-------------------------------------------------|-----------------|
| MALDI | 1558.1408 | 1558.0686 | 72.2   | CL 76:4                                         | C85H158O17P2Na2 |
| MALDI | 1542.1672 | 1542.1360 | 31.2   | CL 78:4                                         | C87H162O17P2    |
| MALDI | 1542.1672 | 1542.1336 | 33.6   | CL 76:1                                         | C85H164O17P2Na  |
| MALDI | 1566.1697 | 1566.1312 | 38.5   | CL 76:0                                         | C85H166O17P2Na2 |
| MALDI | 1568.1812 | 1568.1492 | 32.0   | CL 78:2                                         | C87H166O17P2Na  |
| MALDI | 1548.2160 | 1548.1830 | 33.0   | CL 78:1                                         | C87H168O17P2    |
| MALDI | 1506.1082 | 1506.0421 | 66.1   | CL 76:8                                         | C85H150O17P2    |
| MALDI | 1506.1082 | 1506.0397 | 68.5   | CL 74:5                                         | C83H152O17P2Na  |
| MALDI | 1506.1082 | 1506.0373 | 70.9   | CL 72:2                                         | C81H154O17P2Na2 |
| MALDI | 1586.1718 | 1586.1388 | 33.0   | CL 78:1                                         | C87H168O17P2K   |
| MALDI | 1586.1718 | 1586.0999 | 71.9   | CL 78:4                                         | C87H162O17P2Na2 |
| MALDI | 1516.1508 | 1516.1204 | 30.4   | CL 76:3                                         | C85H160O17P2    |
| MALDI | 1516.1508 | 1516.0628 | 88.0   | CL 78:8                                         | C87H154O17P2    |
| MALDI | 1516.1508 | 1516.1179 | 32.9   | CL 74:0                                         | C83H162O17P2Na  |
| MALDI | 1468.1507 | 1468.0628 | 87.9   | CL 74:4                                         | C83H154O17P2    |
| MALDI | 1490.1343 | 1490.1047 | 29.6   | CL 74:2                                         | C83H158O17P2    |
| MALDI | 1490.1343 | 1490.0472 | 87.1   | CL 76:7                                         | C85H152O17P2    |
| MALDI | 1554.1104 | 1554.0421 | 68.3   | CL 80:12                                        | C89H150O17P2    |
| MALDI | 1554.1104 | 1554.0397 | 70.7   | CL 78:9                                         | C87H152O17P2Na  |
| MALDI | 1554.1104 | 1554.0762 | 34.2   | CL 76:3                                         | C85H160O17P2K   |
| MALDI | 1554.1104 | 1554.0373 | 73.1   | CL 76:6                                         | C85H154O17P2Na2 |
| MALDI | 1621.8333 | 1621.7972 | 36.1   | PIM5 32:0<br>Hex(3)-<br>HexNAc-<br>NeuAc-Cer    | C71H129O38P     |
| MALDI | 1584.8609 | 1584.9360 | -75.1  | 40:1;O2<br>Hex(3)-<br>HexNAc-<br>NeuGc-Cer      | C77H139N3O31    |
| MALDI | 1584.8609 | 1584.8608 | 0.1    | 36:1;O2<br>Hex(3)-<br>HexNAc-<br>NeuAc-Cer      | C73H131N3O32Na  |
| MALDI | 1584.8609 | 1584.8398 | 21.1   | 36:1;O2<br>Hex(3)-<br>HexNAc(2)-<br>Cer 42:2;O2 | C73H131N3O31K   |
| MALDI | 1584.8609 | 1584.9100 | -49.1  | Hex(3)-<br>HexNAc(2)-<br>Cer 44:2;O2            | C76H137N3O28Na2 |
| MALDI | 1606.8485 | 1606.9333 | .-84.8 | Hex(3)-<br>HexNAc-<br>NeuGc-Cer                 | C78H141N3O28K   |
| MALDI | 1606.8485 | 1606.8427 | 5.8    | 36:1;O2                                         | C73H131N3O32Na2 |

Supplementary Table S2: Annotations of species from the averaged MALDI and DESI-MSI, non-recalibrated from LIPIDMAPS, peaks with greater than 0.075% intensity were taken from the charge deconvolution in DataAnalysis 5.0 and searched with parameters of  $\pm 0.005$  Da as peaks were not internally recalibrated. The ionization source is indicated, observed mass, matched mass, delta change, annotation, name, and ionic formula are noted.

| Ionization Source | Input Mass | Matched Mass | Delta (mDa) | Name            | Formula       |
|-------------------|------------|--------------|-------------|-----------------|---------------|
| DESI              | 798.5503   | 798.5491     | 1.2         | IPC 34:0;O3     | C40H80NO12P   |
| DESI              | 798.5503   | 798.5492     | 1.1         | HexCer 36:1;O4  | C42H81NO10K   |
| DESI              | 846.5366   | 846.5372     | -0.6        | SHexCer 36:1;O3 | C42H81NO12SNa |
| DESI              | 846.5366   | 846.5410     | -4.4        | PC 38:5         | C46H82NO8PK   |
| DESI              | 846.5366   | 846.5410     | -4.4        | PE 41:5         | C46H82NO8PK   |
| DESI              | 798.5219   | 798.5256     | -3.7        | PS 35:1         | C41H78NO10PNa |
| DESI              | 798.5219   | 798.5198     | 2.1         | PE dO-40:8      | C45H78NO6PK   |
| DESI              | 826.5821   | 826.5804     | 1.7         | IPC 36:0;O3     | C42H84NO12P   |
| DESI              | 826.5821   | 826.5805     | 1.6         | HexCer 38:1;O4  | C44H85NO10K   |
| DESI              | 848.5658   | 848.5623     | 3.5         | IPC 36:0;O3     | C42H84NO12PNa |
| DESI              | 846.5044   | 846.5046     | -0.2        | PE 40:6;O       | C45H78NO9PK   |
| DESI              | 798.4716   | 798.4682     | 3.4         | PS 34:2         | C40H74NO10PK  |
| DESI              | 820.5050   | 820.5099     | -4.9        | PS 37:4         | C43H76NO10PNa |
| DESI              | 772.5418   | 772.5463     | -4.5        | PS O-34:0       | C40H80NO9PNa  |
| DESI              | 826.5708   | 826.5721     | -1.3        | PE O-42:7       | C47H82NO7PNa  |
| DESI              | 826.5708   | 826.5723     | -1.5        | PC 36:1         | C44H86NO8PK   |
| DESI              | 826.5708   | 826.5723     | -1.5        | PE 39:1         | C44H86NO8PK   |
| DESI              | 820.5239   | 820.5253     | -1.4        | PE 39:4         | C44H80NO8PK   |
| DESI              | 820.5239   | 820.5253     | -1.4        | PC 36:4         | C44H80NO8PK   |
| DESI              | 874.5698   | 874.5685     | 1.3         | SHexCer 38:1;O3 | C44H85NO12SNa |
| DESI              | 874.5698   | 874.5723     | -2.5        | PC 40:5         | C48H86NO8PK   |
| DESI              | 874.5698   | 874.5652     | 4.6         | Hex2Cer 32:0;O2 | C44H85NO13K   |

|      |          |          |      |                |               |
|------|----------|----------|------|----------------|---------------|
| DESI | 844.5241 | 844.5253 | -1.2 | PC 38:6        | C46H80NO8PK   |
| DESI | 844.5241 | 844.5253 | -1.2 | PE 41:6        | C46H80NO8PK   |
| DESI | 826.4980 | 826.4995 | -1.5 | PS 36:2        | C42H78NO10PK  |
| DESI | 820.4522 | 820.4525 | -0.3 | PS 36:5        | C42H72NO10PK  |
| DESI | 874.5337 | 874.5357 | -2.0 | PC 42:11       | C50H78NO8PNa  |
| DESI | 844.4480 | 844.4525 | -4.5 | PS 38:7        | C44H72NO10PK  |
| DESI | 782.5482 | 782.5459 | 2.3  | PE dO-40:8     | C45H78NO6PNa  |
| DESI | 782.5482 | 782.5460 | 2.2  | PC O-34:2      | C42H82NO7PK   |
| DESI | 782.5482 | 782.5460 | 2.2  | PE O-37:2      | C42H82NO7PK   |
| DESI | 800.5192 | 800.5225 | -3.3 | PC 38:9        | C46H74NO8P    |
| DESI | 800.5192 | 800.5201 | -0.9 | PC 36:6        | C44H76NO8PNa  |
| DESI | 800.5192 | 800.5201 | -0.9 | PE 39:6        | C44H76NO8PNa  |
| DESI | 800.5192 | 800.5202 | -1.0 | PS O-35:1      | C41H80NO9PK   |
| DESI | 849.5582 | 849.5616 | -3.4 | PG 40:4        | C46H83O10PNa  |
| DESI | 810.5784 | 810.5773 | 1.1  | PC O-36:2      | C44H86NO7PK   |
| DESI | 810.5784 | 810.5773 | 1.1  | PE O-39:2      | C44H86NO7PK   |
| DESI | 872.5549 | 872.5566 | -1.7 | PC 40:6        | C48H84NO8PK   |
| DESI | 872.5549 | 872.5566 | -1.7 | PE 43:6        | C48H84NO8PK   |
| DESI | 804.5316 | 804.5361 | -4.5 | IPC 34:0;O2    | C40H80NO11PNa |
| DESI | 804.5316 | 804.5304 | 1.2  | PC O-36:5      | C44H80NO7PK   |
| DESI | 866.6594 | 866.6633 | -3.9 | PC 42:4        | C50H92NO8P    |
| DESI | 866.6594 | 866.6609 | -1.5 | PC 40:1        | C48H94NO8PNa  |
| DESI | 866.6594 | 866.6609 | -1.5 | PE 43:1        | C48H94NO8PNa  |
| DESI | 830.5303 | 830.5306 | -0.3 | PE 40:6;O      | C45H78NO9PNa  |
| DESI | 830.5303 | 830.5308 | -0.5 | PS 36:0        | C42H82NO10PK  |
| DESI | 832.5618 | 832.5617 | 0.1  | PC O-38:5      | C46H84NO7PK   |
| DESI | 772.5070 | 772.5099 | -2.9 | PS 33:0        | C39H76NO10PNa |
| DESI | 810.6081 | 810.6066 | 1.5  | HexCer 38:1;O4 | C44H85NO10Na  |

|      |          |          |      |                 |               |
|------|----------|----------|------|-----------------|---------------|
| DESI | 830.5634 | 830.5670 | -3.6 | PC 38:5         | C46H82NO8PNa  |
| DESI | 830.5634 | 830.5670 | -3.6 | PE 41:5         | C46H82NO8PNa  |
| DESI | 830.5634 | 830.5672 | -3.8 | PS O-37:0       | C43H86NO9PK   |
| DESI | 828.5304 | 828.5304 | 0.0  | PC O-38:7       | C46H80NO7PK   |
| DESI | 824.5545 | 824.5552 | -0.7 | SHexCer 36:1;O3 | C42H81NO12S   |
| DESI | 824.5545 | 824.5566 | -2.1 | PE 39:2         | C44H84NO8PK   |
| DESI | 824.5545 | 824.5566 | -2.1 | PC 36:2         | C44H84NO8PK   |
| DESI | 874.5547 | 874.5569 | -2.2 | PS 41:5         | C47H82NO10PNa |
| DESI | 872.5475 | 872.5496 | 2.1  | Hex2Cer 32:1;O2 | C44H83NO13K   |
| DESI | 828.5495 | 828.5538 | -4.3 | PC 40:9         | C48H78NO8P    |
| DESI | 828.5495 | 828.5514 | -1.9 | PC 38:6         | C46H80NO8PNa  |
| DESI | 828.5495 | 828.5514 | -1.9 | PE 41:6         | C46H80NO8PNa  |
| DESI | 828.5495 | 828.5515 | -2.0 | PS O-37:1       | C43H84NO9PK   |
| DESI | 830.5483 | 830.5518 | -3.5 | IPC 36:1;O2     | C42H82NO11PNa |
| DESI | 830.5483 | 830.5460 | 2.3  | PC O-38:6       | C46H82NO7PK   |
| DESI | 810.5963 | 810.6007 | -4.4 | PC 38:4         | C46H84NO8P    |
| DESI | 810.5963 | 810.6007 | -4.4 | PE 41:4         | C46H84NO8P    |
| DESI | 810.5963 | 810.5983 | -2.0 | PE 39:1         | C44H86NO8PNa  |
| DESI | 810.5963 | 810.5983 | -2.0 | PC 36:1         | C44H86NO8PNa  |
| DESI | 868.5205 | 868.5253 | -4.8 | PC 40:8         | C48H80NO8PK   |
| DESI | 814.5160 | 814.5147 | 1.3  | PE O-40:7       | C45H78NO7PK   |
| DESI | 864.6444 | 864.6477 | -2.3 | PC 42:5         | C50H90NO8P    |
| DESI | 864.6444 | 864.6407 | 3.7  | Hex2Cer 34:0;O2 | C46H89NO13    |
| DESI | 864.6444 | 864.6453 | -0.9 | PC 40:2         | C48H92NO8PNa  |
| DESI | 864.6444 | 864.6453 | -0.9 | PE 43:2         | C48H92NO8PNa  |
| DESI | 824.4825 | 824.4838 | -1.3 | PS 36:3         | C42H76NO10PK  |
| DESI | 832.5805 | 832.5851 | -4.6 | PC 40:7         | C48H82NO8P    |
| DESI | 832.5805 | 832.5827 | -2.2 | PC 38:4         | C46H84NO8PNa  |

|      |          |          |      |                 |               |
|------|----------|----------|------|-----------------|---------------|
| DESI | 832.5805 | 832.5827 | -2.2 | PE 41:4         | C46H84NO8PNa  |
| DESI | 804.5497 | 804.5538 | -4.1 | PC 38:7         | C46H78NO8P    |
| DESI | 804.5497 | 804.5538 | -4.1 | PE 41:7         | C46H78NO8P    |
| DESI | 804.5497 | 804.5514 | -1.7 | PE 39:4         | C44H80NO8PNa  |
| DESI | 804.5497 | 804.5514 | -1.7 | PC 36:4         | C44H80NO8PNa  |
| DESI | 806.4901 | 806.4943 | -4.2 | PS 36:4         | C42H74NO10PNa |
| DESI | 866.6457 | 866.6481 | -2.4 | IPC 40:0;O2     | C46H92NO11P   |
| DESI | 866.6457 | 866.6482 | -2.5 | HexCer 42:1;O3  | C48H93NO9K    |
| DESI | 874.4736 | 874.4784 | -4.8 | PE 44:12        | C49H74NO8PK   |
| DESI | 856.5605 | 856.5617 | -1.2 | PC O-40:7       | C48H84NO7PK   |
| DESI | 782.5000 | 782.4967 | 3.3  | PS 36:5         | C42H72NO10P   |
| DESI | 796.5059 | 796.5099 | -4.0 | PS 35:2         | C41H76NO10PNa |
| DESI | 796.5059 | 796.5042 | 1.7  | PE dO-40:9      | C45H76NO6PK   |
| DESI | 810.5267 | 810.5280 | -1.3 | PC 36:6;O2      | C44H76NO10P   |
| DESI | 810.5267 | 810.5280 | -1.3 | PS 38:5         | C44H76NO10P   |
| DESI | 810.5267 | 810.5256 | 1.1  | PS 36:2         | C42H78NO10PNa |
| DESI | 822.5209 | 822.5256 | -4.7 | PS 37:3         | C43H78NO10PNa |
| DESI | 850.5326 | 850.5357 | -3.1 | PC 40:9         | C48H78NO8PNa  |
| DESI | 804.4807 | 804.4810 | -0.3 | PS 38:8         | C44H70NO10P   |
| DESI | 804.4807 | 804.4786 | 2.1  | PS 36:5         | C42H72NO10PNa |
| DESI | 808.5627 | 808.5603 | 2.4  | SHexCer 36:1;O2 | C42H81NO11S   |
| DESI | 808.5627 | 808.5617 | 1.0  | PC O-36:3       | C44H84NO7PK   |
| DESI | 830.4766 | 830.4733 | 3.3  | PS O-38:7       | C44H74NO9PK   |
| DESI | 868.5069 | 868.5101 | -3.2 | PC 36:4;O3      | C44H80NO11PK  |
| DESI | 850.5534 | 850.5569 | -3.5 | PS 39:3         | C45H82NO10PNa |
| DESI | 800.4858 | 800.4838 | 2.0  | PS 34:1         | C40H76NO10PK  |
| DESI | 896.5530 | 896.5566 | -3.6 | PC 42:8         | C50H84NO8PK   |
| DESI | 814.5441 | 814.5440 | 0.1  | IPC 34:0;O4     | C40H80NO13P   |



|      |          |          |      |                |               |
|------|----------|----------|------|----------------|---------------|
| DESI | 830.5068 | 830.5097 | -2.9 | PC 37:6        | C45H78NO8PK   |
| DESI | 830.5068 | 830.5097 | -2.9 | PE 40:6        | C45H78NO8PK   |
| DESI | 830.5068 | 830.5097 | -2.9 | PE O-40:7;O    | C45H78NO8PK   |
| DESI | 864.6298 | 864.6324 | -2.6 | IPC 40:1;O2    | C46H90NO11P   |
| DESI | 864.6298 | 864.6325 | -2.7 | HexCer 42:2;O3 | C48H91NO9K    |
| DESI | 852.6104 | 852.6113 | -0.9 | PS O-42:5      | C48H86NO9P    |
| DESI | 852.6104 | 852.6089 | 1.5  | PS O-40:2      | C46H88NO9PNa  |
| DESI | 852.6104 | 852.6114 | -1.0 | DGTA 40:5      | C50H87NO7K    |
| DESI | 806.5493 | 806.5460 | 3.3  | PC O-36:4      | C44H82NO7PK   |
| DESI | 866.5063 | 866.5097 | -3.4 | PC 40:9        | C48H78NO8PK   |
| DESI | 808.5494 | 808.5487 | 0.7  | PE 40:6;O      | C45H78NO9P    |
| DESI | 808.5494 | 808.5463 | 3.1  | PS O-37:3      | C43H80NO9PNa  |
| DESI | 828.4771 | 828.4810 | -3.9 | PS 40:10       | C46H70NO10P   |
| DESI | 828.4771 | 828.4786 | -1.5 | PS 38:7        | C44H72NO10PNa |
| DESI | 870.5390 | 870.5410 | -2.0 | PC 40:7        | C48H82NO8PK   |
| DESI | 814.5339 | 814.5381 | -4.2 | PE 42:9        | C47H76NO8P    |
| DESI | 814.5339 | 814.5357 | -1.8 | PC 37:6        | C45H78NO8PNa  |
| DESI | 814.5339 | 814.5357 | -1.8 | PE 40:6        | C45H78NO8PNa  |
| DESI | 814.5339 | 814.5357 | -1.8 | PE O-40:7;O    | C45H78NO8PNa  |
| DESI | 814.5339 | 814.5359 | -2.0 | PS O-36:1      | C42H82NO9PK   |
| DESI | 892.5211 | 892.5253 | -4.2 | PC 42:10       | C50H80NO8PK   |
| DESI | 858.5607 | 858.5621 | -1.4 | PS 38:0        | C44H86NO10PK  |
| DESI | 822.5021 | 822.5044 | -2.3 | PC 38:9        | C46H74NO8PNa  |
| DESI | 822.5021 | 822.5046 | -2.5 | PE 38:4;O      | C43H78NO9PK   |
| DESI | 814.4946 | 814.4993 | -4.7 | PS O-38:7      | C44H74NO9PNa  |
| DESI | 814.4946 | 814.4995 | -4.9 | PS 35:1        | C41H78NO10PK  |
| DESI | 838.6265 | 838.6296 | -3.1 | PC 38:1        | C46H90NO8PNa  |
| DESI | 838.6265 | 838.6296 | -3.1 | PE 41:1        | C46H90NO8PNa  |

|      |          |          |      |                 |               |
|------|----------|----------|------|-----------------|---------------|
| DESI | 838.5957 | 838.5932 | 2.5  | PS O-39:2       | C45H86NO9PNa  |
| DESI | 852.6422 | 852.6453 | -3.1 | PC 39:1         | C47H92NO8PNa  |
| DESI | 852.6422 | 852.6453 | -3.1 | PE 42:1         | C47H92NO8PNa  |
| DESI | 856.5811 | 856.5851 | -4.0 | PC 42:9         | C50H82NO8P    |
| DESI | 856.5811 | 856.5827 | -1.6 | PC 40:6         | C48H84NO8PNa  |
| DESI | 856.5811 | 856.5827 | -1.6 | PE 43:6         | C48H84NO8PNa  |
| DESI | 856.5811 | 856.5828 | -1.7 | PS O-39:1       | C45H88NO9PK   |
| DESI | 830.4346 | 830.4369 | -2.3 | PS 37:7         | C43H70NO10PK  |
| DESI | 814.5558 | 814.5593 | -3.5 | PS 38:3         | C44H80NO10P   |
| DESI | 814.5558 | 814.5569 | -1.1 | PS 36:0         | C42H82NO10PNa |
| DESI | 852.6291 | 852.6243 | 4.8  | PC O-39:2       | C47H92NO7PK   |
| DESI | 852.6291 | 852.6243 | 4.8  | PE O-42:2       | C47H92NO7PK   |
| DESI | 806.5079 | 806.5097 | -1.8 | PC 35:4         | C43H78NO8PK   |
| DESI | 806.5079 | 806.5097 | -1.8 | PE 38:4         | C43H78NO8PK   |
| DESI | 806.5079 | 806.5097 | -1.8 | PE O-38:5;O     | C43H78NO8PK   |
| DESI | 876.5984 | 876.5936 | 4.8  | IPC 38:0;O3     | C44H88NO12PNa |
| DESI | 866.5657 | 866.5670 | -1.3 | PE 44:8         | C49H82NO8PNa  |
| DESI | 866.5657 | 866.5672 | -1.5 | PS O-40:3       | C46H86NO9PK   |
| DESI | 920.5529 | 920.5566 | -3.7 | PC 44:10        | C52H84NO8PK   |
| DESI | 814.4631 | 814.4630 | 0.1  | PS 37:7         | C43H70NO10PNa |
| DESI | 796.5231 | 796.5239 | -0.8 | SHexCer 34:1;O3 | C40H77NO12S   |
| DESI | 796.5231 | 796.5252 | -2.1 | PE O-40:8       | C45H76NO7PNa  |
| DESI | 796.5231 | 796.5253 | -2.2 | PC 34:2         | C42H80NO8PK   |
| DESI | 796.5231 | 796.5253 | -2.2 | PE 37:2         | C42H80NO8PK   |
| DESI | 796.5231 | 796.5253 | -2.2 | PE-NMe 36:2     | C42H80NO8PK   |
| DESI | 802.4589 | 802.4630 | -4.1 | PS 36:6         | C42H70NO10PNa |
| DESI | 838.6139 | 838.6168 | -2.9 | IPC 38:0;O2     | C44H88NO11P   |
| DESI | 838.6139 | 838.6169 | -3.0 | HexCer 40:1;O3  | C46H89NO9K    |

|      |          |          |      |                 |               |
|------|----------|----------|------|-----------------|---------------|
| DESI | 864.5506 | 864.5515 | -0.9 | PC 38:4;O       | C46H84NO9PK   |
| DESI | 864.5506 | 864.5515 | -0.9 | PS O-40:4       | C46H84NO9PK   |
| DESI | 806.5297 | 806.5306 | -0.9 | PE 38:4;O       | C43H78NO9PNa  |
| DESI | 806.4383 | 806.4369 | 1.4  | PS 35:5         | C41H70NO10PK  |
| DESI | 854.5449 | 854.5460 | -1.1 | PC O-40:8       | C48H82NO7PK   |
| DESI | 796.4558 | 796.4525 | 3.3  | PS 34:3         | C40H72NO10PK  |
| DESI | 854.5834 | 854.5882 | -4.8 | PS 39:1         | C45H86NO10PNa |
| DESI | 850.6524 | 850.6533 | -0.9 | HexCer 42:1;O2  | C48H93NO8K    |
| DESI | 818.4742 | 818.4733 | 0.9  | PE 38:6;O       | C43H74NO9PK   |
| DESI | 894.5380 | 894.5410 | -3.0 | PC 42:9         | C50H82NO8PK   |
| DESI | 850.4760 | 850.4784 | -2.4 | PE 42:10        | C47H74NO8PK   |
| DESI | 916.5213 | 916.5253 | -4.0 | PC 44:12        | C52H80NO8PK   |
| DESI | 802.5350 | 802.5381 | -3.1 | PC 38:8         | C46H76NO8P    |
| DESI | 802.5350 | 802.5357 | -0.7 | PC 36:5         | C44H78NO8PNa  |
| DESI | 802.5350 | 802.5357 | -0.7 | PE 39:5         | C44H78NO8PNa  |
| DESI | 802.5350 | 802.5359 | -0.9 | PS O-35:0       | C41H82NO9PK   |
| DESI | 880.5439 | 880.5464 | 2.5  | PS 40:3         | C46H84NO10PK  |
| DESI | 842.5460 | 842.5460 | 0.0  | PE O-42:7       | C47H82NO7PK   |
| DESI | 858.5034 | 858.5044 | -1.0 | PE 44:12        | C49H74NO8PNa  |
| DESI | 858.5034 | 858.5046 | -1.2 | PS O-40:7       | C46H78NO9PK   |
| DESI | 851.6363 | 851.6403 | -4.0 | SM 42:2;O2      | C47H93N2O6PK  |
| DESI | 770.5271 | 770.5306 | -3.5 | PS O-34:1       | C40H78NO9PNa  |
| DESI | 840.4918 | 840.4940 | -2.2 | PC 38:8         | C46H76NO8PK   |
| DESI | 836.6089 | 836.6094 | -0.5 | Hex2Cer 32:0;O2 | C44H85NO13    |
| DESI | 756.5336 | 756.5304 | 3.2  | PC O-32:1       | C40H80NO7PK   |
| DESI | 756.5336 | 756.5304 | 3.2  | PE O-35:1       | C40H80NO7PK   |
| DESI | 756.5336 | 756.5386 | -5.0 | HexCer 34:0;O3  | C40H79NO9K    |
| DESI | 854.6102 | 854.6117 | -1.5 | IPC 38:0;O3     | C44H88NO12P   |

|      |          |          |      |                 |               |
|------|----------|----------|------|-----------------|---------------|
| DESI | 854.6102 | 854.6118 | -1.6 | HexCer 40:1;O4  | C46H89NO10K   |
| DESI | 852.5522 | 852.5538 | -1.6 | PC 42:11        | C50H78NO8P    |
| DESI | 852.5522 | 852.5514 | 0.8  | PC 40:8         | C48H80NO8PNa  |
| DESI | 842.5759 | 842.5753 | 0.6  | IPC 36:0;O4     | C42H84NO13P   |
| DESI | 784.5435 | 784.5463 | -2.8 | PS O-35:1       | C41H80NO9PNa  |
| DESI | 878.4925 | 878.4943 | -1.8 | PS 42:10        | C48H74NO10PNa |
| DESI | 818.5018 | 818.5059 | -4.1 | SHexCer 34:1;O3 | C40H77NO12SNa |
| DESI | 790.4960 | 790.4993 | -3.3 | PS O-36:5       | C42H74NO9PNa  |
| DESI | 876.5132 | 876.5151 | -1.9 | PS 40:5         | C46H80NO10PK  |
| DESI | 836.5269 | 836.5225 | 4.4  | PE 44:12        | C49H74NO8P    |
| DESI | 836.5269 | 836.5259 | 1.0  | IPC 34:0;O4     | C40H80NO13PNa |
| DESI | 838.5396 | 838.5357 | 3.9  | PC 39:8         | C47H78NO8PNa  |
| DESI | 838.5396 | 838.5357 | 3.9  | PE 42:8         | C47H78NO8PNa  |
| DESI | 838.5396 | 838.5359 | 3.7  | PS O-38:3       | C44H82NO9PK   |
| DESI | 812.5649 | 812.5649 | 0.0  | HexCer 37:1;O4  | C43H83NO10K   |
| DESI | 812.5014 | 812.4991 | 2.3  | PE O-40:8       | C45H76NO7PK   |
| DESI | 703.5622 | 703.5636 | -1.4 | PA O-37:1       | C40H79O7P     |
| DESI | 703.5622 | 703.5637 | -1.5 | DG 39:1         | C42H80O5K     |
| DESI | 858.5404 | 858.5410 | -0.6 | PC 39:6         | C47H82NO8PK   |
| DESI | 858.5404 | 858.5410 | -0.6 | PE 42:6         | C47H82NO8PK   |
| DESI | 790.5179 | 790.5147 | 3.2  | PE O-38:5       | C43H78NO7PK   |
| DESI | 788.6148 | 788.6164 | -1.6 | PC 36:1         | C44H86NO8P    |
| DESI | 788.6148 | 788.6164 | -1.6 | PE 39:1         | C44H86NO8P    |
| DESI | 860.5199 | 860.5202 | -0.3 | PS O-40:6       | C46H80NO9PK   |
| DESI | 880.6032 | 880.6038 | -0.6 | PS 41:2         | C47H88NO10PNa |
| DESI | 862.4984 | 862.4995 | -1.1 | PS 39:5         | C45H78NO10PK  |
| DESI | 912.6135 | 912.6090 | 4.5  | PS 42:1         | C48H92NO10PK  |
| DESI | 689.5456 | 689.5480 | -2.4 | PA O-36:1       | C39H77O7P     |

|      |          |          |      |             |               |
|------|----------|----------|------|-------------|---------------|
| DESI | 689.5456 | 689.5481 | -2.5 | DG 38:1     | C41H78O5K     |
| DESI | 967.7180 | 967.7151 | 2.9  | TG 58:9     | C61H100O6K    |
| DESI | 774.5054 | 774.5068 | -1.4 | PC 36:8     | C44H72NO8P    |
| DESI | 774.5054 | 774.5068 | -1.4 | PE 39:8     | C44H72NO8P    |
| DESI | 774.5054 | 774.5044 | 1.0  | PC 34:5     | C42H74NO8PNa  |
| DESI | 774.5054 | 774.5044 | 1.0  | PE 37:5     | C42H74NO8PNa  |
| DESI | 774.5054 | 774.5046 | 0.8  | PS O-33:0   | C39H78NO9PK   |
| DESI | 880.5796 | 880.5827 | -3.1 | PC 42:8     | C50H84NO8PNa  |
| DESI | 880.6427 | 880.6402 | 2.5  | PS O-42:2   | C48H92NO9PNa  |
| DESI | 836.5005 | 836.5050 | -4.5 | IPC 34:0;O3 | C40H80NO12PK  |
| DESI | 770.4918 | 770.4967 | -4.9 | PS 35:4     | C41H72NO10P   |
| DESI | 770.4918 | 770.4943 | -2.5 | PS 33:1     | C39H74NO10PNa |
| DESI | 770.4918 | 770.4885 | 3.3  | PE dO-38:8  | C43H74NO6PK   |
| DESI | 717.5782 | 717.5793 | -1.1 | PA O-38:1   | C41H81O7P     |
| DESI | 717.5782 | 717.5792 | -1.0 | ST 46:4;O4  | C46H78O4Na    |
| DESI | 717.5782 | 717.5794 | -1.2 | DG 40:1     | C43H82O5K     |
| DESI | 880.6240 | 880.6192 | 4.8  | PC 40:2     | C48H92NO8PK   |
| DESI | 880.6240 | 880.6192 | 4.8  | PE 43:2     | C48H92NO8PK   |
| DESI | 878.6248 | 878.6245 | 0.3  | PS O-42:3   | C48H90NO9PNa  |
| DESI | 788.5481 | 788.5436 | 4.5  | PS 36:2     | C42H78NO10P   |
| DESI | 786.4650 | 786.4682 | -3.2 | PS 33:1     | C39H74NO10PK  |
| DESI | 731.5948 | 731.5949 | -0.1 | PA O-39:1   | C42H83O7P     |
| DESI | 731.5948 | 731.5950 | -0.2 | DG 41:1     | C44H84O5K     |
| DESI | 900.5111 | 900.5151 | -4.0 | PS 42:7     | C48H80NO10PK  |
| DESI | 747.4977 | 747.4959 | 1.8  | PA 40:7     | C43H71O8P     |
| DESI | 747.4977 | 747.4935 | 4.2  | PA 38:4     | C41H73O8PNa   |
| DESI | 747.4977 | 747.4937 | 4.0  | PG O-32:0   | C38H77O9PK    |
| DESI | 691.4310 | 691.4333 | -2.3 | PA 36:7     | C39H63O8P     |

|       |          |          |      |            |               |
|-------|----------|----------|------|------------|---------------|
| DESI  | 691.4310 | 691.4309 | 0.1  | PA 34:4    | C37H65O8PNa   |
| DESI  | 691.4310 | 691.4311 | -0.1 | PG O-28:0  | C34H69O9PK    |
| DESI  | 745.6121 | 745.6106 | 1.5  | PA O-40:1  | C43H85O7P     |
| DESI  | 745.6121 | 745.6107 | 1.4  | DG 42:1    | C45H86O5K     |
| DESI  | 862.6330 | 862.6320 | 1.0  | PC 42:6    | C50H88NO8P    |
| DESI  | 862.6330 | 862.6296 | 3.4  | PC 40:3    | C48H90NO8PNa  |
| DESI  | 753.6038 | 753.6004 | 3.4  | TG 43:3    | C46H82O6Na    |
| DESI  | 835.6457 | 835.6423 | 3.4  | PG 40:0    | C46H91O10P    |
| DESI  | 727.5218 | 727.5248 | -3.0 | PA 36:0    | C39H77O8PNa   |
| DESI  | 835.6739 | 835.6786 | -4.7 | PG O-41:0  | C47H95O9P     |
| DESI  | 835.6739 | 835.6786 | -4.7 | TG 49:4    | C52H92O6Na    |
| DESI  | 786.4869 | 786.4834 | 3.5  | PE O-38:7  | C43H74NO7PK   |
| DESI  | 739.4704 | 739.4675 | 2.9  | PA 36:2    | C39H73O8PK    |
| DESI  | 719.5590 | 719.5585 | 0.5  | PA 37:0    | C40H79O8P     |
| DESI  | 719.5590 | 719.5609 | -1.9 | DG 44:9    | C47H74O5      |
| DESI  | 719.5590 | 719.5585 | 0.5  | DG 42:6    | C45H76O5Na    |
| DESI  | 719.5590 | 719.5586 | 0.4  | TG 39:0    | C42H80O6K     |
| MALDI | 798.5364 | 798.5408 | -4.4 | PE O-40:7  | C45H78NO7PNa  |
| MALDI | 798.5364 | 798.5410 | -4.6 | PC 34:1    | C42H82NO8PK   |
| MALDI | 798.5364 | 798.5410 | -4.6 | PE 37:1    | C42H82NO8PK   |
| MALDI | 798.5219 | 798.5256 | -3.7 | PS 35:1    | C41H78NO10PNa |
| MALDI | 798.5219 | 798.5198 | 2.1  | PE dO-40:8 | C45H78NO6PK   |
| MALDI | 760.5818 | 760.5851 | -3.3 | PC 34:1    | C42H82NO8P    |
| MALDI | 760.5818 | 760.5851 | -3.3 | PE 37:1    | C42H82NO8P    |
| MALDI | 772.5219 | 772.5252 | -3.3 | PE O-38:6  | C43H76NO7PNa  |
| MALDI | 772.5219 | 772.5253 | -3.4 | PC 32:0    | C40H80NO8PK   |
| MALDI | 772.5219 | 772.5253 | -3.4 | PE 35:0    | C40H80NO8PK   |
| MALDI | 760.5672 | 760.5639 | 3.3  | PE dO-40:8 | C45H78NO6P    |

|       |          |          |      |            |               |
|-------|----------|----------|------|------------|---------------|
| MALDI | 772.5068 | 772.5099 | -3.1 | PS 33:0    | C39H76NO10PNa |
| MALDI | 734.5708 | 734.5694 | 1.4  | PC 32:0    | C40H80NO8P    |
| MALDI | 734.5708 | 734.5694 | 1.4  | PE 35:0    | C40H80NO8P    |
| MALDI | 826.5687 | 826.5721 | -3.4 | PE O-42:7  | C47H82NO7PNa  |
| MALDI | 826.5687 | 826.5723 | -3.6 | PE 39:1    | C44H86NO8PK   |
| MALDI | 826.5687 | 826.5723 | -3.6 | PC 36:1    | C44H86NO8PK   |
| MALDI | 782.5673 | 782.5694 | -2.1 | PE 39:4    | C44H80NO8P    |
| MALDI | 782.5673 | 782.5694 | -2.1 | PC 36:4    | C44H80NO8P    |
| MALDI | 782.5673 | 782.5670 | 0.3  | PC 34:1    | C42H82NO8PNa  |
| MALDI | 782.5673 | 782.5670 | 0.3  | PE 37:1    | C42H82NO8PNa  |
| MALDI | 844.5248 | 844.5253 | -0.5 | PC 38:6    | C46H80NO8PK   |
| MALDI | 844.5248 | 844.5253 | -0.5 | PE 41:6    | C46H80NO8PK   |
| MALDI | 820.5224 | 820.5253 | -2.9 | PC 36:4    | C44H80NO8PK   |
| MALDI | 820.5224 | 820.5253 | -2.9 | PE 39:4    | C44H80NO8PK   |
| MALDI | 806.5688 | 806.5694 | -0.6 | PC 38:6    | C46H80NO8P    |
| MALDI | 806.5688 | 806.5694 | -0.6 | PE 41:6    | C46H80NO8P    |
| MALDI | 806.5688 | 806.5670 | 1.8  | PC 36:3    | C44H82NO8PNa  |
| MALDI | 806.5688 | 806.5670 | 1.8  | PE 39:3    | C44H82NO8PNa  |
| MALDI | 810.5967 | 810.6007 | -4.0 | PC 38:4    | C46H84NO8P    |
| MALDI | 810.5967 | 810.6007 | -4.0 | PE 41:4    | C46H84NO8P    |
| MALDI | 810.5967 | 810.5983 | -1.6 | PC 36:1    | C44H86NO8PNa  |
| MALDI | 810.5967 | 810.5983 | -1.6 | PE 39:1    | C44H86NO8PNa  |
| MALDI | 848.5532 | 848.5566 | -3.4 | PC 38:4    | C46H84NO8PK   |
| MALDI | 848.5532 | 848.5566 | -3.4 | PE 41:4    | C46H84NO8PK   |
| MALDI | 788.6152 | 788.6164 | -1.2 | PC 36:1    | C44H86NO8P    |
| MALDI | 788.6152 | 788.6164 | -1.2 | PE 39:1    | C44H86NO8P    |
| MALDI | 782.5487 | 782.5459 | 2.8  | PE dO-40:8 | C45H78NO6PNa  |
| MALDI | 782.5487 | 782.5460 | 2.7  | PC O-34:2  | C42H82NO7PK   |

|       |          |          |      |                 |               |
|-------|----------|----------|------|-----------------|---------------|
| MALDI | 782.5487 | 782.5460 | 2.7  | PE O-37:2       | C42H82NO7PK   |
| MALDI | 734.5528 | 734.5541 | -1.3 | HexCer 35:2;O2  | C41H77NO8Na   |
| MALDI | 800.5377 | 800.5412 | -3.5 | PS 35:0         | C41H80NO10PNa |
| MALDI | 760.5246 | 760.5252 | -0.6 | PC O-34:5       | C42H76NO7PNa  |
| MALDI | 769.5594 | 769.5620 | -2.6 | EPC 39:1;O2     | C41H83N2O6PK  |
| MALDI | 769.5594 | 769.5620 | -2.6 | SM 36:1;O2      | C41H83N2O6PK  |
| MALDI | 830.5083 | 830.5097 | -1.4 | PC 37:6         | C45H78NO8PK   |
| MALDI | 830.5083 | 830.5097 | -1.4 | PE 40:6         | C45H78NO8PK   |
| MALDI | 830.5083 | 830.5097 | -1.4 | PE O-40:7;O     | C45H78NO8PK   |
| MALDI | 872.5563 | 872.5566 | -0.3 | PC 40:6         | C48H84NO8PK   |
| MALDI | 872.5563 | 872.5566 | -0.3 | PE 43:6         | C48H84NO8PK   |
| MALDI | 806.5494 | 806.5460 | 3.4  | PC O-36:4       | C44H82NO7PK   |
| MALDI | 810.5794 | 810.5773 | 2.1  | PC O-36:2       | C44H86NO7PK   |
| MALDI | 810.5794 | 810.5773 | 2.1  | PE O-39:2       | C44H86NO7PK   |
| MALDI | 834.5995 | 834.6007 | -1.2 | PC 40:6         | C48H84NO8P    |
| MALDI | 834.5995 | 834.6007 | -1.2 | PE 43:6         | C48H84NO8P    |
| MALDI | 834.5995 | 834.5983 | 1.2  | PC 38:3         | C46H86NO8PNa  |
| MALDI | 834.5995 | 834.5983 | 1.2  | PE 41:3         | C46H86NO8PNa  |
| MALDI | 798.4271 | 798.4317 | -4.6 | PS 36:8         | C42H66NO10PNa |
| MALDI | 826.5011 | 826.4995 | 1.6  | PS 36:2         | C42H78NO10PK  |
| MALDI | 824.5542 | 824.5552 | -1.0 | SHexCer 36:1;O3 | C42H81NO12S   |
| MALDI | 824.5542 | 824.5566 | -2.4 | PC 36:2         | C44H84NO8PK   |
| MALDI | 824.5542 | 824.5566 | -2.4 | PE 39:2         | C44H84NO8PK   |
| MALDI | 756.5502 | 756.5538 | -3.6 | PC 34:3         | C42H78NO8P    |
| MALDI | 756.5502 | 756.5538 | -3.6 | PE 37:3         | C42H78NO8P    |
| MALDI | 756.5502 | 756.5514 | -1.2 | PC 32:0         | C40H80NO8PNa  |
| MALDI | 756.5502 | 756.5514 | -1.2 | PE 35:0         | C40H80NO8PNa  |
| MALDI | 739.4662 | 739.4675 | -1.3 | PA 36:2         | C39H73O8PK    |



|       |          |          |      |                 |               |
|-------|----------|----------|------|-----------------|---------------|
| MALDI | 844.4511 | 844.4525 | -1.4 | PS 38:7         | C44H72NO10PK  |
| MALDI | 734.5129 | 734.5177 | -4.8 | HexCer 34:3;O3  | C40H73NO9Na   |
| MALDI | 820.4550 | 820.4525 | 2.5  | PS 36:5         | C42H72NO10PK  |
| MALDI | 731.6061 | 731.6061 | 0.0  | EPC 39:1;O2     | C41H83N2O6P   |
| MALDI | 731.6061 | 731.6061 | 0.0  | SM 36:1;O2      | C41H83N2O6P   |
| MALDI | 814.5138 | 814.5147 | -0.9 | PE O-40:7       | C45H78NO7PK   |
| MALDI | 834.5793 | 834.5773 | 2.0  | PC O-38:4       | C46H86NO7PK   |
| MALDI | 832.5819 | 832.5851 | -3.2 | PC 40:7         | C48H82NO8P    |
| MALDI | 832.5819 | 832.5827 | -0.8 | PC 38:4         | C46H84NO8PNa  |
| MALDI | 832.5819 | 832.5827 | -0.8 | PE 41:4         | C46H84NO8PNa  |
| MALDI | 824.5454 | 824.5436 | 1.8  | PS 39:5         | C45H78NO10P   |
| MALDI | 824.5454 | 824.5412 | 4.2  | PS 37:2         | C43H80NO10PNa |
| MALDI | 786.5985 | 786.6007 | -2.2 | PC 36:2         | C44H84NO8P    |
| MALDI | 786.5985 | 786.6007 | -2.2 | PE 39:2         | C44H84NO8P    |
| MALDI | 848.4816 | 848.4838 | -2.2 | PC 36:6;O2      | C44H76NO10PK  |
| MALDI | 848.4816 | 848.4838 | -2.2 | PS 38:5         | C44H76NO10PK  |
| MALDI | 806.4895 | 806.4943 | -4.8 | PS 36:4         | C42H74NO10PNa |
| MALDI | 810.5315 | 810.5280 | 3.5  | PC 36:6;O2      | C44H76NO10P   |
| MALDI | 810.5315 | 810.5280 | 3.5  | PS 38:5         | C44H76NO10P   |
| MALDI | 769.5001 | 769.5014 | -1.3 | PG 36:5         | C42H73O10P    |
| MALDI | 769.5001 | 769.4990 | 1.1  | LBPA 34:2       | C40H75O10PNa  |
| MALDI | 769.5001 | 769.4990 | 1.1  | PG 34:2         | C40H75O10PNa  |
| MALDI | 874.4986 | 874.4995 | -0.9 | PS 40:6         | C46H78NO10PK  |
| MALDI | 796.5239 | 796.5239 | 0.0  | SHexCer 34:1;O3 | C40H77NO12S   |
| MALDI | 796.5239 | 796.5252 | -1.3 | PE O-40:8       | C45H76NO7PNa  |
| MALDI | 796.5239 | 796.5253 | -1.4 | PC 34:2         | C42H80NO8PK   |
| MALDI | 796.5239 | 796.5253 | -1.4 | PE-NMe 36:2     | C42H80NO8PK   |
| MALDI | 796.5239 | 796.5253 | -1.4 | PE 37:2         | C42H80NO8PK   |

|       |          |          |      |                |               |
|-------|----------|----------|------|----------------|---------------|
| MALDI | 804.5504 | 804.5538 | -3.4 | PC 38:7        | C46H78NO8P    |
| MALDI | 804.5504 | 804.5538 | -3.4 | PE 41:7        | C46H78NO8P    |
| MALDI | 804.5504 | 804.5514 | -1.0 | PE 39:4        | C44H80NO8PNa  |
| MALDI | 804.5504 | 804.5514 | -1.0 | PC 36:4        | C44H80NO8PNa  |
| MALDI | 713.4520 | 713.4518 | 0.2  | PA 34:1        | C37H71O8PK    |
| MALDI | 786.5814 | 786.5773 | 4.1  | PC O-34:0      | C42H86NO7PK   |
| MALDI | 786.5814 | 786.5773 | 4.1  | PE O-37:0      | C42H86NO7PK   |
| MALDI | 852.4906 | 852.4940 | -3.4 | PE 42:9        | C47H76NO8PK   |
| MALDI | 784.5230 | 784.5253 | -2.3 | PC 33:1        | C41H80NO8PK   |
| MALDI | 784.5230 | 784.5253 | -2.3 | PE 36:1        | C41H80NO8PK   |
| MALDI | 784.5230 | 784.5253 | -2.3 | PE-NMe2 34:1   | C41H80NO8PK   |
| MALDI | 801.5231 | 801.5195 | 3.6  | PA O-42:6      | C45H79O7PK    |
| MALDI | 802.4782 | 802.4784 | -0.2 | PC 35:6        | C43H74NO8PK   |
| MALDI | 802.4782 | 802.4784 | -0.2 | PE 38:6        | C43H74NO8PK   |
| MALDI | 802.4782 | 802.4784 | -0.2 | PE O-38:7;O    | C43H74NO8PK   |
| MALDI | 866.6479 | 866.6481 | -0.2 | IPC 40:0;O2    | C46H92NO11P   |
| MALDI | 866.6479 | 866.6482 | -0.3 | HexCer 42:1;O3 | C48H93NO9K    |
| MALDI | 790.5132 | 790.5147 | -1.5 | PE O-38:5      | C43H78NO7PK   |
| MALDI | 832.5619 | 832.5617 | 0.2  | PC O-38:5      | C46H84NO7PK   |
| MALDI | 864.6316 | 864.6324 | -0.8 | IPC 40:1;O2    | C46H90NO11P   |
| MALDI | 864.6316 | 864.6325 | -0.9 | HexCer 42:2;O3 | C48H91NO9K    |
| MALDI | 796.5057 | 796.5099 | -4.2 | PS 35:2        | C41H76NO10PNa |
| MALDI | 796.5057 | 796.5042 | 1.5  | PE dO-40:9     | C45H76NO6PK   |
| MALDI | 834.5282 | 834.5280 | 0.2  | PS 40:7        | C46H76NO10P   |
| MALDI | 834.5282 | 834.5256 | -2.6 | PC 36:5;O2     | C44H78NO10PNa |
| MALDI | 834.5282 | 834.5256 | -2.6 | PS 38:4        | C44H78NO10PNa |
| MALDI | 822.5206 | 822.5256 | -5.0 | PS 37:3        | C43H78NO10PNa |
| MALDI | 804.5314 | 804.5361 | -4.7 | IPC 34:0;O2    | C40H80NO11PNa |

|       |          |          |      |                |               |
|-------|----------|----------|------|----------------|---------------|
| MALDI | 804.5314 | 804.5304 | 1.0  | PC O-36:5      | C44H80NO7PK   |
| MALDI | 828.5304 | 828.5304 | 0.0  | PC O-38:7      | C46H80NO7PK   |
| MALDI | 828.4906 | 828.4940 | -3.4 | PC 37:7        | C45H76NO8PK   |
| MALDI | 828.4906 | 828.4940 | -3.4 | PE 40:7        | C45H76NO8PK   |
| MALDI | 963.4780 | 963.4761 | 1.9  | CL 36:4        | C45H82O15P2K  |
| MALDI | 870.5411 | 870.5410 | 0.1  | PC 40:7        | C48H82NO8PK   |
| MALDI | 826.5185 | 826.5147 | 3.8  | PC O-38:8      | C46H78NO7PK   |
| MALDI | 830.4376 | 830.4369 | 0.7  | PS 37:7        | C43H70NO10PK  |
| MALDI | 762.5399 | 762.5408 | 0.9  | PC O-34:4      | C42H78NO7PNa  |
| MALDI | 762.5399 | 762.5408 | 0.9  | PE O-37:4      | C42H78NO7PNa  |
| MALDI | 925.5209 | 925.5202 | 0.7  | CL 36:4        | C45H82O15P2   |
| MALDI | 925.5209 | 925.5203 | 0.6  | Glc-GP 38:4    | C47H83O13PK   |
| MALDI | 925.5209 | 925.5203 | 0.6  | PI 38:4        | C47H83O13PK   |
| MALDI | 874.4758 | 874.4784 | -2.6 | PE 44:12       | C49H74NO8PK   |
| MALDI | 753.5866 | 753.5881 | -1.5 | EPC 39:1;O2    | C41H83N2O6PNa |
| MALDI | 753.5866 | 753.5881 | -1.5 | SM 36:1;O2     | C41H83N2O6PNa |
| MALDI | 770.4914 | 770.4943 | -2.9 | PS 33:1        | C39H74NO10PNa |
| MALDI | 770.4914 | 770.4885 | -2.9 | PE dO-38:8     | C43H74NO6PK   |
| MALDI | 782.5212 | 782.5179 | 3.3  | HexCer 35:2;O4 | C41H77NO10K   |
| MALDI | 824.4856 | 824.4838 | 1.8  | PS 36:3        | C42H76NO10PK  |
| MALDI | 767.4973 | 767.4988 | 1.5  | PA 38:2        | C41H77O8PK    |
| MALDI | 785.4510 | 785.4518 | -0.8 | PA 40:7        | C43H71O8PK    |
| MALDI | 896.4813 | 896.4838 | -2.5 | PS 42:9        | C48H76NO10PK  |
| MALDI | 734.4731 | 734.4755 | -2.4 | PE 36:7        | C41H68NO8P    |
| MALDI | 734.4731 | 734.4731 | 0.0  | PC 31:4        | C39H70NO8PNa  |
| MALDI | 734.4731 | 734.4731 | 0.0  | PE 34:4        | C39H70NO8PNa  |
| MALDI | 851.6391 | 851.6403 | -1.2 | SM 42:2;O2     | C47H93N2O6PK  |
| MALDI | 756.4913 | 756.4940 | -2.7 | PC 31:1        | C39H76NO8PK   |

|       |          |          |      |                |               |
|-------|----------|----------|------|----------------|---------------|
| MALDI | 756.4913 | 756.4940 | -2.7 | PE 34:1        | C39H76NO8PK   |
| MALDI | 834.5384 | 834.5410 | -2.6 | PC 37:4        | C45H82NO8PK   |
| MALDI | 834.5384 | 834.5410 | -2.6 | PE 40:4        | C45H82NO8PK   |
| MALDI | 814.5337 | 814.5381 | -4.4 | PE 42:9        | C47H76NO8P    |
| MALDI | 814.5337 | 814.5357 | -2.0 | PC 37:6        | C45H78NO8PNa  |
| MALDI | 814.5337 | 814.5357 | -2.0 | PE 40:6        | C45H78NO8PNa  |
| MALDI | 814.5337 | 814.5357 | -2.0 | PE O-40:7;O    | C45H78NO8PNa  |
| MALDI | 814.5337 | 814.5359 | -2.2 | PS O-36:1      | C42H82NO9PK   |
| MALDI | 802.4590 | 802.4630 | -4.0 | PS 36:6        | C42H70NO10PNa |
| MALDI | 838.6126 | 838.6168 | -4.2 | IPC 38:0;O2    | C44H88NO11P   |
| MALDI | 838.6126 | 838.6086 | 4.0  | PC O-38:2      | C46H90NO7PK   |
| MALDI | 838.6126 | 838.6169 | -4.3 | HexCer 40:1;O3 | C46H89NO9K    |
| MALDI | 758.5673 | 758.5694 | -2.1 | PE-NMe 36:2    | C42H80NO8P    |
| MALDI | 758.5673 | 758.5694 | -2.1 | PE 37:2        | C42H80NO8P    |
| MALDI | 758.5673 | 758.5694 | -2.1 | PC 34:2        | C42H80NO8P    |
| MALDI | 774.5988 | 774.6007 | -1.9 | PC 35:1        | C43H84NO8P    |
| MALDI | 774.5988 | 774.6007 | -1.9 | PE 38:1        | C43H84NO8P    |
| MALDI | 812.5552 | 812.5565 | -1.3 | PC O-38:7      | C46H80NO7PNa  |
| MALDI | 812.5552 | 812.5566 | -1.4 | PC 35:1        | C43H84NO8PK   |
| MALDI | 812.5552 | 812.5566 | -1.4 | PE 38:1        | C43H84NO8PK   |
| MALDI | 856.5827 | 856.5851 | -2.4 | PC 42:9        | C50H82NO8P    |
| MALDI | 856.5827 | 856.5827 | 0.0  | PC 40:6        | C48H84NO8PNa  |
| MALDI | 856.5827 | 856.5827 | 0.0  | PE 43:6        | C48H84NO8PNa  |
| MALDI | 856.5827 | 856.5828 | -0.1 | PS O-39:1      | C45H88NO9PK   |
| MALDI | 806.4417 | 806.4369 | 4.8  | PS 35:5        | C41H70NO10PK  |
| MALDI | 732.5530 | 732.5538 | -0.8 | PC 32:1        | C40H78NO8P    |
| MALDI | 732.5530 | 732.5538 | -0.8 | PE 35:1        | C40H78NO8P    |
| MALDI | 732.5530 | 732.5538 | -0.8 | PE-NMe 34:1    | C40H78NO8P    |

|       |          |          |      |                 |              |
|-------|----------|----------|------|-----------------|--------------|
| MALDI | 789.4809 | 789.4831 | -2.2 | PA 40:5         | C43H75O8PK   |
| MALDI | 761.4503 | 761.4518 | -1.5 | PA 38:5         | C41H71O8PK   |
| MALDI | 810.5484 | 810.5492 | -0.8 | HexCer 37:2;O4  | C43H81NO10K  |
| MALDI | 864.6207 | 864.6229 | -2.2 | SHexCer 40:1;O2 | C46H89NO11S  |
| MALDI | 864.6207 | 864.6243 | -3.6 | PC O-40:3       | C48H92NO7PK  |
| MALDI | 786.4816 | 786.4834 | -1.8 | PE O-38:7       | C43H74NO7PK  |
| MALDI | 767.4809 | 767.4858 | -4.9 | PG 36:6         | C42H71O10P   |
| MALDI | 767.4809 | 767.4834 | -2.5 | PG 34:3         | C40H73O10PNa |
| MALDI | 810.4834 | 810.4834 | 0.0  | PE O-40:9       | C45H74NO7PK  |
| MALDI | 818.5424 | 818.5460 | -3.6 | PE O-40:5       | C45H82NO7PK  |
| MALDI | 804.4842 | 804.4810 | 3.2  | PS 38:8         | C44H70NO10P  |
| MALDI | 767.5441 | 767.5464 | -2.3 | EPC 39:2;O2     | C41H81N2O6PK |
| MALDI | 767.5441 | 767.5464 | -2.3 | SM 36:2;O2      | C41H81N2O6PK |
| MALDI | 767.5279 | 767.5304 | -2.5 | GlcADG 34:3     | C43H74O11    |
| MALDI | 767.5279 | 767.5304 | -2.5 | MGDG 34:4;O     | C43H74O11    |
| MALDI | 775.5084 | 775.5038 | 4.6  | PA O-40:5       | C43H77O7PK   |
| MALDI | 774.5823 | 774.5796 | 2.7  | PC dO-38:8      | C46H80NO6P   |
| MALDI | 774.5823 | 774.5854 | -3.1 | HexCer 38:3;O2  | C44H81NO8Na  |
| MALDI | 789.4637 | 789.4677 | -4.0 | PG 36:6         | C42H71O10PNa |
| MALDI | 813.4828 | 813.4831 | -0.3 | PA 42:7         | C45H75O8PK   |
| MALDI | 876.5864 | 876.5879 | -1.5 | PC 40:4         | C48H88NO8PK  |
| MALDI | 876.5864 | 876.5879 | -1.5 | PE 43:4         | C48H88NO8PK  |
| MALDI | 845.6618 | 845.6630 | -1.2 | PG O-42:2       | C48H93O9P    |
| MALDI | 845.6618 | 845.6654 | -3.6 | TG 52:9         | C55H88O6     |
| MALDI | 845.6618 | 845.6606 | 1.2  | PG dO-40:10;1   | C46H95O9PNa  |
| MALDI | 845.6618 | 845.6630 | -1.2 | TG 50:6         | C53H90O6Na   |
| MALDI | 838.6295 | 838.6320 | -2.5 | PC 40:4         | C48H88NO8P   |
| MALDI | 838.6295 | 838.6320 | -2.5 | PE 43:4         | C48H88NO8P   |

|       |          |          |      |                 |               |
|-------|----------|----------|------|-----------------|---------------|
| MALDI | 838.6295 | 838.6296 | -0.1 | PC 38:1         | C46H90NO8PNa  |
| MALDI | 838.6295 | 838.6296 | -0.1 | PE 41:1         | C46H90NO8PNa  |
| MALDI | 785.4331 | 785.4364 | -3.3 | PG 36:8         | C42H67O10PNa  |
| MALDI | 758.5085 | 758.5097 | -1.2 | PC 31:0         | C39H78NO8PK   |
| MALDI | 758.5085 | 758.5097 | -1.2 | PE 34:0         | C39H78NO8PK   |
| MALDI | 758.5085 | 758.5097 | -1.2 | PE-NMe2 32:0    | C39H78NO8PK   |
| MALDI | 874.5502 | 874.5475 | 2.7  | SHexCer 38:1;O2 | C44H85NO11SK  |
| MALDI | 723.4928 | 723.4959 | -3.1 | PA 38:5         | C41H71O8P     |
| MALDI | 723.4928 | 723.4935 | -0.7 | PA 36:2         | C39H73O8PNa   |
| MALDI | 824.4614 | 824.4627 | -1.3 | PE 40:9         | C45H72NO8PK   |
| MALDI | 741.4812 | 741.4831 | -1.9 | PA 36:1         | C39H75O8PK    |
| MALDI | 947.5038 | 947.5021 | 1.7  | CL 36:4         | C45H82O15P2Na |
| MALDI | 947.5038 | 947.5046 | -0.8 | PI 40:7         | C49H81O13PK   |
| MALDI | 813.6820 | 813.6844 | -2.4 | SM 42:2;O2      | C47H93N2O6P   |
| MALDI | 852.6105 | 852.6113 | -0.8 | PS O-42:5       | C48H86NO9P    |
| MALDI | 852.6105 | 852.6089 | 1.6  | PS O-40:2       | C46H88NO9PNa  |
| MALDI | 852.6105 | 852.6114 | -0.9 | DGTA 40:5       | C50H87NO7K    |
| MALDI | 766.5139 | 766.5147 | -0.8 | PC O-33:3       | C41H78NO7PK   |
| MALDI | 766.5139 | 766.5147 | -0.8 | PE O-36:3       | C41H78NO7PK   |
| MALDI | 848.6130 | 848.6164 | -3.4 | PC 41:6         | C49H86NO8P    |
| MALDI | 848.6130 | 848.6164 | -3.4 | PE 44:6         | C49H86NO8P    |
| MALDI | 848.6130 | 848.6140 | -1.0 | PC 39:3         | C47H88NO8PNa  |
| MALDI | 848.6130 | 848.6140 | -1.0 | PE 42:3         | C47H88NO8PNa  |
| MALDI | 697.4789 | 697.4803 | -1.4 | PA 36:4         | C39H69O8P     |
| MALDI | 697.4789 | 697.4779 | 1.0  | PA 34:1         | C37H71O8PNa   |
| MALDI | 748.5849 | 748.5851 | -0.2 | PC 33:0         | C41H82NO8P    |
| MALDI | 748.5849 | 748.5851 | -0.2 | PE 36:0         | C41H82NO8P    |
| MALDI | 732.5375 | 732.5326 | 4.9  | PE dO-38:8      | C43H74NO6P    |

|       |          |          |      |                 |               |
|-------|----------|----------|------|-----------------|---------------|
| MALDI | 732.5375 | 732.5385 | -1.0 | HexCer 35:3;O2  | C41H75NO8Na   |
| MALDI | 792.5523 | 792.5538 | -1.5 | PC 37:6         | C45H78NO8P    |
| MALDI | 792.5523 | 792.5538 | -1.5 | PE 40:6         | C45H78NO8P    |
| MALDI | 792.5523 | 792.5538 | -1.5 | PE O-40:7;O     | C45H78NO8P    |
| MALDI | 792.5523 | 792.5514 | 0.9  | PC 35:3         | C43H80NO8PNa  |
| MALDI | 792.5523 | 792.5514 | 0.9  | PE 38:3         | C43H80NO8PNa  |
| MALDI | 746.6056 | 746.6058 | -0.2 | PC O-34:1       | C42H84NO7P    |
| MALDI | 746.6056 | 746.6058 | -0.2 | PE O-37:1       | C42H84NO7P    |
| MALDI | 858.5241 | 858.5280 | -3.9 | PS 42:9         | C48H76NO10P   |
| MALDI | 858.5241 | 858.5256 | -1.5 | PS 40:6         | C46H78NO10PNa |
| MALDI | 813.4633 | 813.4677 | -4.4 | PG 38:8         | C44H71O10PNa  |
| MALDI | 790.5346 | 790.5381 | -3.5 | PC 37:7         | C45H76NO8P    |
| MALDI | 790.5346 | 790.5381 | -3.5 | PE 40:7         | C45H76NO8P    |
| MALDI | 790.5346 | 790.5357 | -1.1 | PC 35:4         | C43H78NO8PNa  |
| MALDI | 790.5346 | 790.5357 | -1.1 | PE 38:4         | C43H78NO8PNa  |
| MALDI | 790.5346 | 790.5357 | -1.1 | PE O-38:5;O     | C43H78NO8PNa  |
| MALDI | 758.4926 | 758.4967 | -4.1 | PS 34:3         | C40H72NO10P   |
| MALDI | 758.4926 | 758.4943 | -1.7 | PS 32:0         | C38H74NO10PNa |
| MALDI | 866.5702 | 866.5670 | 3.2  | PE 44:8         | C49H82NO8PNa  |
| MALDI | 866.5702 | 866.5672 | 3.0  | PS O-40:3       | C46H86NO9PK   |
| MALDI | 864.5548 | 864.5572 | -2.4 | IPC 36:0;O4     | C42H84NO13PNa |
| MALDI | 864.5548 | 864.5515 | 3.3  | PC 38:4;O       | C46H84NO9PK   |
| MALDI | 864.5548 | 864.5515 | 3.3  | PS O-40:4       | C46H84NO9PK   |
| MALDI | 852.5869 | 852.5865 | 0.4  | SHexCer 38:1;O3 | C44H85NO12S   |
| MALDI | 852.5869 | 852.5879 | -1.0 | PC 38:2         | C46H88NO8PK   |
| MALDI | 852.5869 | 852.5879 | -1.0 | PE 41:2         | C46H88NO8PK   |
| MALDI | 830.5552 | 830.5542 | 1.0  | PC 36:4;O3      | C44H80NO11P   |
| MALDI | 830.5552 | 830.5518 | 3.4  | IPC 36:1;O2     | C42H82NO11PNa |

|       |          |          |      |                |              |
|-------|----------|----------|------|----------------|--------------|
| MALDI | 729.5911 | 729.5905 | 0.6  | EPC 39:2;O2    | C41H81N2O6P  |
| MALDI | 729.5911 | 729.5905 | 0.6  | SM 36:2;O2     | C41H81N2O6P  |
| MALDI | 854.6025 | 854.6036 | -1.1 | PC 38:1        | C46H90NO8PK  |
| MALDI | 854.6025 | 854.6036 | -1.1 | PE 41:1        | C46H90NO8PK  |
| MALDI | 780.5504 | 780.5538 | -3.4 | PC 36:5        | C44H78NO8P   |
| MALDI | 780.5504 | 780.5538 | -3.4 | PE 39:5        | C44H78NO8P   |
| MALDI | 780.5504 | 780.5514 | -1.0 | PC 34:2        | C42H80NO8PNa |
| MALDI | 780.5504 | 780.5514 | -1.0 | PE 37:2        | C42H80NO8PNa |
| MALDI | 780.5504 | 780.5514 | -1.0 | PE-NMe 36:2    | C42H80NO8PNa |
| MALDI | 748.5685 | 748.5698 | -1.3 | HexCer 36:2;O2 | C42H79NO8Na  |
| MALDI | 786.5052 | 786.5068 | -1.6 | PE 40:9        | C45H72NO8P   |
| MALDI | 786.5052 | 786.5044 | 0.8  | PC 35:6        | C43H74NO8PNa |
| MALDI | 786.5052 | 786.5044 | 0.8  | PE 38:6        | C43H74NO8PNa |
| MALDI | 786.5052 | 786.5044 | 0.8  | PE O-38:7;O    | C43H74NO8PNa |
| MALDI | 786.5052 | 786.5046 | 0.6  | PS O-34:1      | C40H78NO9PK  |
| MALDI | 753.5283 | 753.5307 | -2.4 | EPC 38:2;O2    | C40H79N2O6PK |
| MALDI | 766.4973 | 766.5017 | 4.4  | PS O-36:6      | C42H72NO9P   |
| MALDI | 766.4973 | 766.4993 | -2.0 | PS O-34:3      | C40H74NO9PNa |
| MALDI | 909.5474 | 909.5488 | -1.4 | PI 40:7        | C49H81O13P   |
| MALDI | 909.5474 | 909.5463 | 1.1  | Glc-GP 38:4    | C47H83O13PNa |
| MALDI | 909.5474 | 909.5463 | 1.1  | PI 38:4        | C47H83O13PNa |
| MALDI | 778.4754 | 778.4784 | -3.0 | PC 33:4        | C41H74NO8PK  |
| MALDI | 778.4754 | 778.4784 | -3.0 | PE 36:4        | C41H74NO8PK  |
| MALDI | 778.4754 | 778.4784 | -3.0 | PE O-36:5;O    | C41H74NO8PK  |
| MALDI | 854.5683 | 854.5694 | -1.1 | PC 42:10       | C50H80NO8P   |
| MALDI | 854.5683 | 854.5670 | 1.3  | PC 40:7        | C48H82NO8PNa |
| MALDI | 854.5683 | 854.5672 | 1.1  | PS O-39:2      | C45H86NO9PK  |
| MALDI | 836.5176 | 836.5225 | -4.9 | PE 44:12       | C49H74NO8P   |



|       |          |          |      |                |              |
|-------|----------|----------|------|----------------|--------------|
| MALDI | 836.5176 | 836.5201 | -2.5 | PE 42:9        | C47H76NO8PNa |
| MALDI | 836.5176 | 836.5202 | -2.6 | PC 36:4;O      | C44H80NO9PK  |
| MALDI | 836.5176 | 836.5202 | -2.6 | PS O-38:4      | C44H80NO9PK  |
| MALDI | 792.5341 | 792.5304 | 3.7  | PC O-35:4      | C43H80NO7PK  |
| MALDI | 792.5341 | 792.5304 | 3.7  | PE O-38:4      | C43H80NO7PK  |
| MALDI | 792.5341 | 792.5386 | -4.5 | HexCer 37:3;O3 | C43H79NO9K   |
| MALDI | 776.5602 | 776.5589 | 1.3  | PE O-40:7      | C45H78NO7P   |
| MALDI | 776.5602 | 776.5565 | 3.7  | PC O-35:4      | C43H80NO7PNa |
| MALDI | 776.5602 | 776.5565 | 3.7  | PE O-38:4      | C43H80NO7PNa |
| MALDI | 776.5602 | 776.5647 | -4.5 | HexCer 37:3;O3 | C43H79NO9Na  |
| MALDI | 746.5694 | 746.5694 | 0.0  | PC 33:1        | C41H80NO8P   |
| MALDI | 746.5694 | 746.5694 | 0.0  | PE 36:1        | C41H80NO8P   |
| MALDI | 746.5694 | 746.5694 | 0.0  | PE-NMe2 34:1   | C41H80NO8P   |
| MALDI | 751.3111 | 751.3067 | 4.4  | PI 23:2;O2     | C32H57O15PK  |
| MALDI | 856.5233 | 856.5253 | 2.0  | PC 39:7        | C47H80NO8PK  |
| MALDI | 856.5233 | 856.5253 | 2.0  | PE 42:7        | C47H80NO8PK  |
| MALDI | 858.5413 | 858.5410 | 0.3  | PC 39:6        | C47H82NO8PK  |
| MALDI | 858.5413 | 858.5410 | 0.3  | PE 42:6        | C47H82NO8PK  |
| MALDI | 916.6558 | 916.6556 | 0.2  | PC O-44:5      | C52H96NO7PK  |
| MALDI | 688.3947 | 688.3950 | -0.3 | LPS O-27:2;O   | C33H64NO9PK  |
| MALDI | 688.3947 | 688.3950 | -0.3 | PC 25:1;O      | C33H64NO9PK  |
| MALDI | 765.4651 | 765.4701 | -5.0 | PG 36:7        | C42H69O10P   |
| MALDI | 765.4651 | 765.4677 | -2.6 | PG 34:4        | C40H71O10PNa |
| MALDI | 853.6540 | 853.6559 | -1.9 | SM 42:1;O2     | C47H95N2O6PK |
| MALDI | 744.4932 | 744.4963 | -3.1 | PE O-38:9      | C43H70NO7P   |
| MALDI | 744.4932 | 744.4939 | -0.7 | PE O-36:6      | C41H72NO7PNa |
| MALDI | 744.4932 | 744.4940 | -0.8 | PC 30:0        | C38H76NO8PK  |
| MALDI | 744.4932 | 744.4940 | -0.8 | PE 33:0        | C38H76NO8PK  |

|       |          |          |      |                 |               |
|-------|----------|----------|------|-----------------|---------------|
| MALDI | 744.4932 | 744.4940 | -0.8 | PE-NMe 32:0     | C38H76NO8PK   |
| MALDI | 802.6301 | 802.6320 | 1.9  | PC 37:1         | C45H88NO8P    |
| MALDI | 802.6301 | 802.6320 | 1.9  | PE 40:1         | C45H88NO8P    |
| MALDI | 850.6737 | 850.6742 | -0.5 | HexCer 42:1;O3  | C48H93NO9Na   |
| MALDI | 860.6143 | 860.6164 | -2.1 | PC 42:7         | C50H86NO8P    |
| MALDI | 860.6143 | 860.6140 | 0.3  | PC 40:4         | C48H88NO8PNa  |
| MALDI | 860.6143 | 860.6140 | 0.3  | PE 43:4         | C48H88NO8PNa  |
| MALDI | 741.5303 | 741.5307 | -0.4 | EPC 37:1;O2     | C39H79N2O6PK  |
| MALDI | 741.5303 | 741.5307 | -0.4 | SM 34:1;O2      | C39H79N2O6PK  |
| MALDI | 763.5579 | 763.5612 | -3.3 | PA O-40:3       | C43H81O7PNa   |
| MALDI | 751.3305 | 751.3276 | 2.9  | PI 23:2;O3      | C32H57O16PNa  |
| MALDI | 918.4652 | 918.4682 | -3.0 | PS 44:12        | C50H74NO10PK  |
| MALDI | 706.5398 | 706.5381 | 1.7  | PC 30:0         | C38H76NO8P    |
| MALDI | 706.5398 | 706.5381 | 1.7  | PE 33:0         | C38H76NO8P    |
| MALDI | 706.5398 | 706.5381 | 1.7  | PE-NMe 32:0     | C38H76NO8P    |
| MALDI | 700.4273 | 700.4314 | -4.1 | PC 27:1         | C35H68NO8PK   |
| MALDI | 700.4273 | 700.4314 | -4.1 | PE 30:1         | C35H68NO8PK   |
| MALDI | 880.5087 | 880.5123 | -3.6 | PS 44:12        | C50H74NO10P   |
| MALDI | 880.5087 | 880.5099 | -1.2 | PS 42:9         | C48H76NO10PNa |
| MALDI | 878.6487 | 878.6482 | 0.5  | HexCer 43:2;O3  | C49H93NO9K    |
| MALDI | 928.5962 | 928.5944 | 1.8  | SHexCer 42:2;O2 | C48H91NO11SK  |
| MALDI | 751.5236 | 751.5272 | -3.6 | PA 40:5         | C43H75O8P     |
| MALDI | 751.5236 | 751.5248 | -1.2 | PA 38:2         | C41H77O8PNa   |
| MALDI | 699.4194 | 699.4208 | -1.4 | PG 29:2         | C35H65O10PNa  |
| MALDI | 703.5765 | 703.5748 | 1.7  | EPC 37:1;O2     | C39H79N2O6P   |
| MALDI | 703.5765 | 703.5748 | 1.7  | SM 34:1;O2      | C39H79N2O6P   |
| MALDI | 744.4776 | 744.4810 | -3.4 | PS 33:3         | C39H70NO10P   |
| MALDI | 744.4776 | 744.4786 | -1.0 | PS 31:0         | C37H72NO10PNa |

|       |          |          |      |                 |               |
|-------|----------|----------|------|-----------------|---------------|
| MALDI | 716.4236 | 716.4263 | -2.7 | LPS O-29:2;O    | C35H68NO9PK   |
| MALDI | 716.4236 | 716.4263 | -2.7 | PS O-29:1       | C35H68NO9PK   |
| MALDI | 704.3910 | 704.3899 | 1.1  | PC 25:1;O2      | C33H64NO10PK  |
| MALDI | 704.3910 | 704.3899 | 1.1  | PS 27:0         | C33H64NO10PK  |
| MALDI | 780.4904 | 780.4940 | -3.6 | PC 33:3         | C41H76NO8PK   |
| MALDI | 780.4904 | 780.4940 | -3.6 | PE 36:3         | C41H76NO8PK   |
| MALDI | 678.4709 | 678.4704 | 0.5  | LPS O-29:2;O    | C35H68NO9P    |
| MALDI | 678.4709 | 678.4704 | 0.5  | PS O-29:1       | C35H68NO9P    |
| MALDI | 749.2958 | 749.2910 | 4.8  | PI 23:3;O2      | C32H55O15PK   |
| MALDI | 878.5307 | 878.5308 | -0.1 | PS 40:4         | C46H82NO10PK  |
| MALDI | 890.6395 | 890.6386 | 0.9  | SHexCer 42:2;O2 | C48H91NO11S   |
| MALDI | 890.6395 | 890.6399 | 0.9  | PC O-42:4       | C50H94NO7PK   |
| MALDI | 982.5487 | 982.5529 | -4.2 | CDP-DG 34:0     | C46H85N3O15P2 |
| MALDI | 720.5556 | 720.5538 | 1.8  | PC 31:0         | C39H78NO8P    |
| MALDI | 720.5556 | 720.5538 | 1.8  | PE 34:0         | C39H78NO8P    |
| MALDI | 720.5556 | 720.5538 | 1.8  | PE-NMe2 32:0    | C39H78NO8P    |
| MALDI | 711.4389 | 711.4362 | 2.7  | PA 34:2         | C37H69O8PK    |
| MALDI | 749.3159 | 749.3120 | 3.9  | PI 23:3;O3      | C32H55O16PNa  |
| MALDI | 815.7004 | 815.7000 | 0.4  | SM 42:1;O2      | C47H95N2O6P   |

Supplementary Table S3: Sutter Instruments P-2000 micropipette puller program for the tip pulled from 100µm inner diameter by 200µm outer diameter fused silica. For the tip shown the program was looped one time, the last line used was line three with heat on for 2.27 seconds.

| HEAT | FIL | VEL | DELAY | PULL |
|------|-----|-----|-------|------|
| 280  | 0   | 25  | 180   | 25   |
| 250  | 0   | 25  | 180   | 25   |
| 250  | 0   | 25  | 180   | 25   |
